# Supplementary material
Source: PubMed Central journal article supplement (PMC5773395)
Supplement: NIHMS924799-supplement-Supplement.pdf [file NIHMS924799-supplement-Supplement.pdf]

**SUPPLEMENTARY MATERIAL**

**Deconstructing empathy: Neuroanatomical dissociations between affect sharing and prosocial motivation using a patient lesion model.**

**Supplementary Table 1:** Neural correlates of RSMS-EX and Affect Sharing

| Anatomic Region and Structure                         | Right Lateralized |     |     |      | Left Lateralized |     |     |      |
|-------------------------------------------------------|-------------------|-----|-----|------|------------------|-----|-----|------|
|                                                       | x                 | y   | z   | maxT | x                | y   | z   | maxT |
| <b><i>Subcortical/striatal</i></b>                    |                   |     |     |      |                  |     |     |      |
| Hippocampus                                           | 28                | -8  | -19 | 8.91 | -25              | -10 | -18 | 6.52 |
| Amygdala                                              | 28                | -5  | -21 | 8.87 | -27              | -2  | -19 | 6.63 |
| Putamen                                               | 30                | -10 | -10 | 8.19 | -15              | 9   | -13 | 6.69 |
| Pallidum                                              | 24                | -8  | -7  | 8.18 | -13              | 6   | -6  | 5.85 |
| Caudate                                               | 12                | 12  | -6  | 6.73 | -10              | 9   | -6  | 6.44 |
| Thalamus Proper                                       | 25                | -31 | -3  | 5.70 | -10              | -35 | 1   | 5.09 |
| Brain Stem                                            | 10                | -26 | -3  | 4.52 | 10               | -26 | -3  | 4.52 |
| <b><i>Temporal</i></b>                                |                   |     |     |      |                  |     |     |      |
| Temporal pole (TMP)                                   | 21                | 10  | -34 | 9.41 | -27              | 9   | -28 | 7.05 |
| Middle temporal gyrus (MTG)                           | 55                | 4   | -24 | 8.76 | -48              | 1   | -39 | 5.79 |
| Entorhinal area (Ent)                                 | 21                | 4   | -21 | 8.76 | -27              | 3   | -21 | 7.14 |
| Inferior temporal gyrus (ITG)                         | 52                | -7  | -34 | 8.62 | -43              | 0   | -42 | 6.05 |
| Posterior insula (Pins)                               | 40                | -8  | -9  | 8.58 | -40              | -7  | -10 | 6.31 |
| Planum polare (PP)                                    | 42                | -8  | -9  | 8.57 | -40              | -8  | -12 | 6.41 |
| Anterior insula (Ains)                                | 37                | 7   | 0   | 8.37 | -30              | 9   | -19 | 6.74 |
| Superior temporal gyrus (STG)                         | 52                | 3   | -21 | 8.21 | -52              | 3   | -22 | 4.97 |
| Fusiform gyrus (FuG)                                  | 27                | -1  | -42 | 8.09 | -24              | -4  | -42 | 5.67 |
| Parahippocampal gyrus (PHG)                           | 27                | -31 | -19 | 7.58 | -25              | -7  | -39 | 5.49 |
| Transverse temporal gyrus (TTG)                       | 43                | -14 | 0   | 6.46 | -42              | -16 | 7   | 4.64 |
| <b><i>Frontal</i></b>                                 |                   |     |     |      |                  |     |     |      |
| Posterior orbital gyrus (POrG)                        | 22                | 9   | -22 | 8.71 | -25              | 9   | -25 | 7.38 |
| Basal Forebrain                                       | 19                | 7   | -19 | 8.68 | -15              | 6   | -21 | 7.61 |
| Medial orbital gyrus (MOrG)                           | 18                | 7   | -21 | 8.66 | -13              | 18  | -19 | 8.10 |
| Subcallosal area (SCA)                                | 10                | 15  | -18 | 7.91 | -12              | 16  | -19 | 8.06 |
| Gyrus rectus (Gre)                                    | 10                | 21  | -16 | 7.66 | -12              | 19  | -19 | 7.96 |
| Orbital part of the inferior frontal gyrus (OrIFG)    | 36                | 22  | -9  | 7.25 | -31              | 25  | -6  | 5.69 |
| Frontal operculum (FO)                                | 39                | 10  | 4   | 7.21 | -36              | 12  | 4   | 5.34 |
| Anterior cingulate gyrus (ACgG)                       | 0                 | 21  | -13 | 7.13 | -1               | 24  | -13 | 7.02 |
| Medial frontal cortex (MFC)                           | 0                 | 21  | -15 | 7.10 | -9               | 22  | -16 | 7.21 |
| Central operculum (CO)                                | 39                | 7   | 5   | 7.10 | -39              | 1   | 7   | 4.95 |
| Lateral orbital gyrus (LOrG)                          | 34                | 24  | -9  | 7.01 | -34              | 36  | -16 | 5.88 |
| Superior frontal gyrus medial segment (MSFG)          | 12                | 45  | 10  | 7.00 | -3               | 48  | -6  | 6.11 |
| Anterior orbital gyrus (AOrG)                         | 33                | 37  | -16 | 6.80 | -31              | 36  | -16 | 5.87 |
| Triangular part of the inferior frontal gyrus (TrIFG) | 51                | 25  | -7  | 6.09 | -43              | 43  | -6  | 4.35 |
| Middle frontal gyrus (MFG)                            | 28                | 37  | 40  | 6.01 | -45              | 45  | -7  | 4.53 |
| Superior frontal gyrus (SFG)                          | 27                | 37  | 40  | 6.01 | -10              | 45  | 43  | 4.60 |

|                                                      |    |     |     |      |     |     |     |      |
|------------------------------------------------------|----|-----|-----|------|-----|-----|-----|------|
| Lingual gyrus (LiG)                                  | 25 | -37 | -13 | 5.99 |     |     |     | NS   |
| Frontal pole (FRP)                                   | 12 | 64  | -3  | 5.84 | -15 | 61  | -12 | 4.43 |
| Middle cingulate gyrus (MCgG)                        | 4  | -11 | 35  | 5.73 | 0   | -10 | 32  | 5.33 |
| Opercular part of the inferior frontal gyrus (OpIFG) | 52 | 21  | 2   | 5.49 |     |     |     | NS   |
| Supplementary motor cortex (SMC)                     | 7  | 24  | 32  | 5.30 | -6  | 24  | 32  | 5.30 |
| <b>Posterior cingulate gyrus (PCgG)</b>              | 15 | -35 | -1  | 4.89 | -12 | -37 | 0   | 4.68 |
| <b>Cerebellum</b>                                    |    |     |     |      |     |     |     |      |
| <b>Cerebellum Exterior</b>                           | 34 | -34 | -31 | 6.44 | -27 | -31 | -27 | 5.77 |

*RSMS-EX main effects:* regions where RSMS-EX correlated with gray matter volumes, adjusting for age, gender, MMSE, total intracranial volume, and magnet strength. All effects shown in this table are corrected for family-wise error [FWE] across the whole brain at a significance level of  $p < 0.05$ ). *Affect sharing analysis:* bold text indicates regions where RSMS-EX correlated with gray matter volumes, adjusting for IRI-EC score, age, gender, MMSE, total intracranial volume, and magnet strength (FWE corrected at a significance level of  $P < 0.05$ ). Locations of peak coordinates are reported in MNI reference space. NS = Not significant at  $pFWE < 0.05$ .

**Supplementary Table 2.** Neural correlates of IRI-EC and Prosocial Motivation

| Anatomic Region and Structure                             | Right Lateralized |     |     |      | Left Lateralized |     |     |      |
|-----------------------------------------------------------|-------------------|-----|-----|------|------------------|-----|-----|------|
|                                                           | X                 | y   | z   | maxT | x                | y   | z   | maxT |
| <b><i>Subcortical/striatal</i></b>                        |                   |     |     |      |                  |     |     |      |
| <b>Caudate</b>                                            | 10                | 12  | -6  | 7.51 | -6               | 9   | -1  | 6.92 |
| <b>Putamen</b>                                            | 31                | -8  | -6  | 7.51 | -15              | 9   | -4  | 6.27 |
| <b>Accumbens Area (NaCC)</b>                              | 10                | 10  | -6  | 7.50 | -6               | 12  | -3  | 6.71 |
| Pallidum                                                  | 13                | 6   | -6  | 7.28 | -13              | 6   | -4  | 6.32 |
| Amygdala                                                  | 30                | -5  | -22 | 6.59 | -28              | -8  | -19 | 5.10 |
| Hippocampus                                               | 28                | -7  | -22 | 6.53 | -34              | -19 | -12 | 5.13 |
| Thalamus Proper                                           | 4                 | -5  | -4  | 5.48 |                  |     |     | NS   |
| <b><i>Temporal</i></b>                                    |                   |     |     |      |                  |     |     |      |
| <b>Anterior insula (Ains)</b>                             | 28                | 18  | -16 | 8.77 | -34              | 19  | -10 | 6.53 |
| Posterior insula (Pins)                                   | 37                | 3   | -7  | 7.71 | -37              | -7  | -9  | 6.05 |
| Middle temporal gyrus (MTG)                               | 49                | -4  | -34 | 7.67 | -48              | 1   | -39 | 5.01 |
| Inferior temporal gyrus (ITG)                             | 49                | -6  | -34 | 7.65 | -24              | 1   | -43 | 5.08 |
| Temporal pole (TMP)                                       | 25                | 9   | -27 | 7.58 | -24              | 7   | -31 | 5.84 |
| Planum polare (PP)                                        | 45                | 3   | -10 | 7.17 | -39              | -8  | -12 | 5.75 |
| Entorhinal area (Ent)                                     | 24                | 6   | -24 | 7.15 | -31              | 3   | -27 | 5.70 |
| Superior temporal gyrus (STG)                             | 52                | 3   | -21 | 6.96 |                  |     |     | NS   |
| Fusiform gyrus (FuG)                                      | 30                | -5  | -45 | 6.50 | -24              | -4  | -40 | 4.83 |
| Parahippocampal gyrus (PHG)                               | 15                | -5  | -24 | 5.73 | -22              | -7  | -39 | 4.72 |
| Transverse temporal gyrus (TTG)                           | 43                | -14 | 0   | 5.47 |                  |     |     | NS   |
| <b><i>Frontal</i></b>                                     |                   |     |     |      |                  |     |     |      |
| <b>Posterior orbital gyrus (POrG)</b>                     | 28                | 19  | -16 | 8.81 | -24              | 19  | -22 | 6.61 |
| <b>Medial orbital gyrus (MOrG)</b>                        | 18                | 19  | -21 | 8.22 | -15              | 21  | -21 | 7.23 |
| <b>Lateral orbital gyrus (LOrG)</b>                       | 36                | 24  | -12 | 7.80 | -33              | 24  | -7  | 5.99 |
| <b>Subcallosal area (SCA)</b>                             | 6                 | 9   | -16 | 7.77 | -12              | 18  | -21 | 7.02 |
| <b>Orbital part of the inferior frontal gyrus (OrIFG)</b> | 37                | 22  | -10 | 7.74 | -37              | 22  | -9  | 6.09 |
| Basal Forebrain                                           | 19                | 7   | -19 | 7.54 | -15              | 6   | -21 | 6.08 |
| <b>Gyrus rectus (Gre)</b>                                 | 7                 | 19  | -21 | 7.50 | -12              | 21  | -21 | 7.07 |
| Anterior orbital gyrus (AOrg)                             | 33                | 37  | -16 | 7.31 | -33              | 37  | -16 | 5.61 |
| Medial frontal cortex (MFC)                               | 3                 | 21  | -21 | 7.04 | -7               | 22  | -19 | 6.85 |
| Anterior cingulate gyrus (ACgG)                           | 10                | 45  | 8   | 6.80 | -3               | 24  | -16 | 6.66 |
| Superior frontal gyrus medial segment (MSFG)              | 12                | 46  | 8   | 6.79 | -3               | 34  | 31  | 6.24 |
| Frontal operculum (FO)                                    | 40                | 12  | 1   | 6.64 | -36              | 24  | -1  | 5.11 |
| Central operculum (CO)                                    | 39                | 7   | 5   | 6.26 | -37              | 7   | 7   | 4.86 |
| Triangular part of the inferior frontal gyrus (TriFG)     | 51                | 27  | 2   | 5.95 | -52              | 28  | 17  | 4.87 |
| Superior frontal gyrus (SFG)                              | 16                | 42  | 37  | 5.90 | -12              | 45  | 41  | 5.31 |
| Supplementary motor cortex (SMC)                          | 4                 | 24  | 34  | 5.51 | -4               | 24  | 35  | 5.47 |

|                                                      |    |    |     |      |     |    |     |      |
|------------------------------------------------------|----|----|-----|------|-----|----|-----|------|
| Opercular part of the inferior frontal gyrus (OpIFG) | 51 | 24 | 5   | 5.49 |     |    |     | NS   |
| Middle cingulate gyrus (MCgG)                        | 7  | 24 | 29  | 5.40 | -1  | 24 | 34  | 5.31 |
| Frontal pole (FRP)                                   | 7  | 61 | -16 | 5.30 | -15 | 63 | -12 | 5.25 |
| Middle frontal gyrus (MFG)                           | 25 | 37 | 37  | 5.13 | -51 | 27 | 19  | 4.49 |

*IRI-EC main effects:* regions where empathic concern correlated with gray matter volumes, adjusting for age, gender, MMSE, total intracranial volume, and magnet strength All effects shown in this table (corrected for family-wise error [FWE] across the whole brain at a significance level of  $p < 0.05$ ). *Prosocial motivation analysis:* bold text indicates regions where empathic concern correlated with gray matter volumes, adjusting for RSMS-EX score, age, gender, MMSE, total intracranial volume, and magnet strength (FWE corrected across the whole brain at a significance level of  $p < 0.05$ ). Locations of peak coordinates are reported in MNI reference space. NS = Not significant at  $p_{FWE} < 0.05$

**Supplementary Table 3.** Group Differences in mean IRI-EC and RSMS-EX score

|              | <b>NC</b><br><i>(n = 44)</i> | <b>bvFTD</b><br><i>(n = 58)</i> | <b>nvPPA</b><br><i>(n = 28)</i> | <b>svPPA</b><br><i>(n = 42)</i> | <b>AD</b><br><i>(n = 75)</i> | <b>PSP</b><br><i>(n = 28)</i> |                |
|--------------|------------------------------|---------------------------------|---------------------------------|---------------------------------|------------------------------|-------------------------------|----------------|
| <b>NC</b>    | -                            | 12.82<br>(9.0, 16.6)            | -                               | 10.46<br>(6.4, 14.6)            | 5.55<br>(1.8, 9.2)           | 7.77<br>(3.2, 12.4)           | <b>RSMS-EX</b> |
| <b>bvFTD</b> | -9.19<br>(-12.5, -5.8)       | -                               | -8.97<br>(-13.3, -4.6)          | -                               | -7.26<br>(-10.7, -3.9)       | -5.04<br>(-9.4, -0.7)         |                |
| <b>nvPPA</b> | -                            | 6.47<br>(2.6, 10.4)             | -                               | 6.61<br>(2.0, 11.2)             | -                            | -                             |                |
| <b>svPPA</b> | -6.41<br>(-10.0, -2.9)       | -                               | -                               | -                               | -4.91<br>(-8.6, -1.2)        | -                             |                |
| <b>AD</b>    | -                            | 8.92<br>(5.9, 11.9)             | -                               | 6.15<br>(2.9, 9.4)              | -                            | -                             |                |
| <b>PSP</b>   | -                            | 6.57<br>(2.7, 10.4)             | -                               | -                               | -                            | -                             |                |
|              | <b>IRI-EC</b>                |                                 |                                 |                                 |                              |                               |                |

RSMS-EX is represented in the top half of the table (light gray) and IRI-EC in the bottom half of the table (dark gray). The least-squares mean differences, adjusted for age, gender, and MMSE are reported with 95% confidence intervals for all patient groups that had significantly different scores on each measure ( $p < 0.05$ ). Positive t-values indicate that the score of the patient group in the left column is greater than the corresponding patient group in the top row. Negative t-values indicate that the score of the patient group in the left column is lower than the patient group on the top row. - =not significant
